# Supplementary material
Source: PubMed Central journal article supplement (PMC2638751)

Supplementary data. SAMMD analysis of fusidic acid stimulon and overlaps with the cold shock- and stringent-response. Lines ending with arrowheads indicate genes up-regulated during the response and lines ending with a perpendicular line indicate genes that are down-regulated by response.

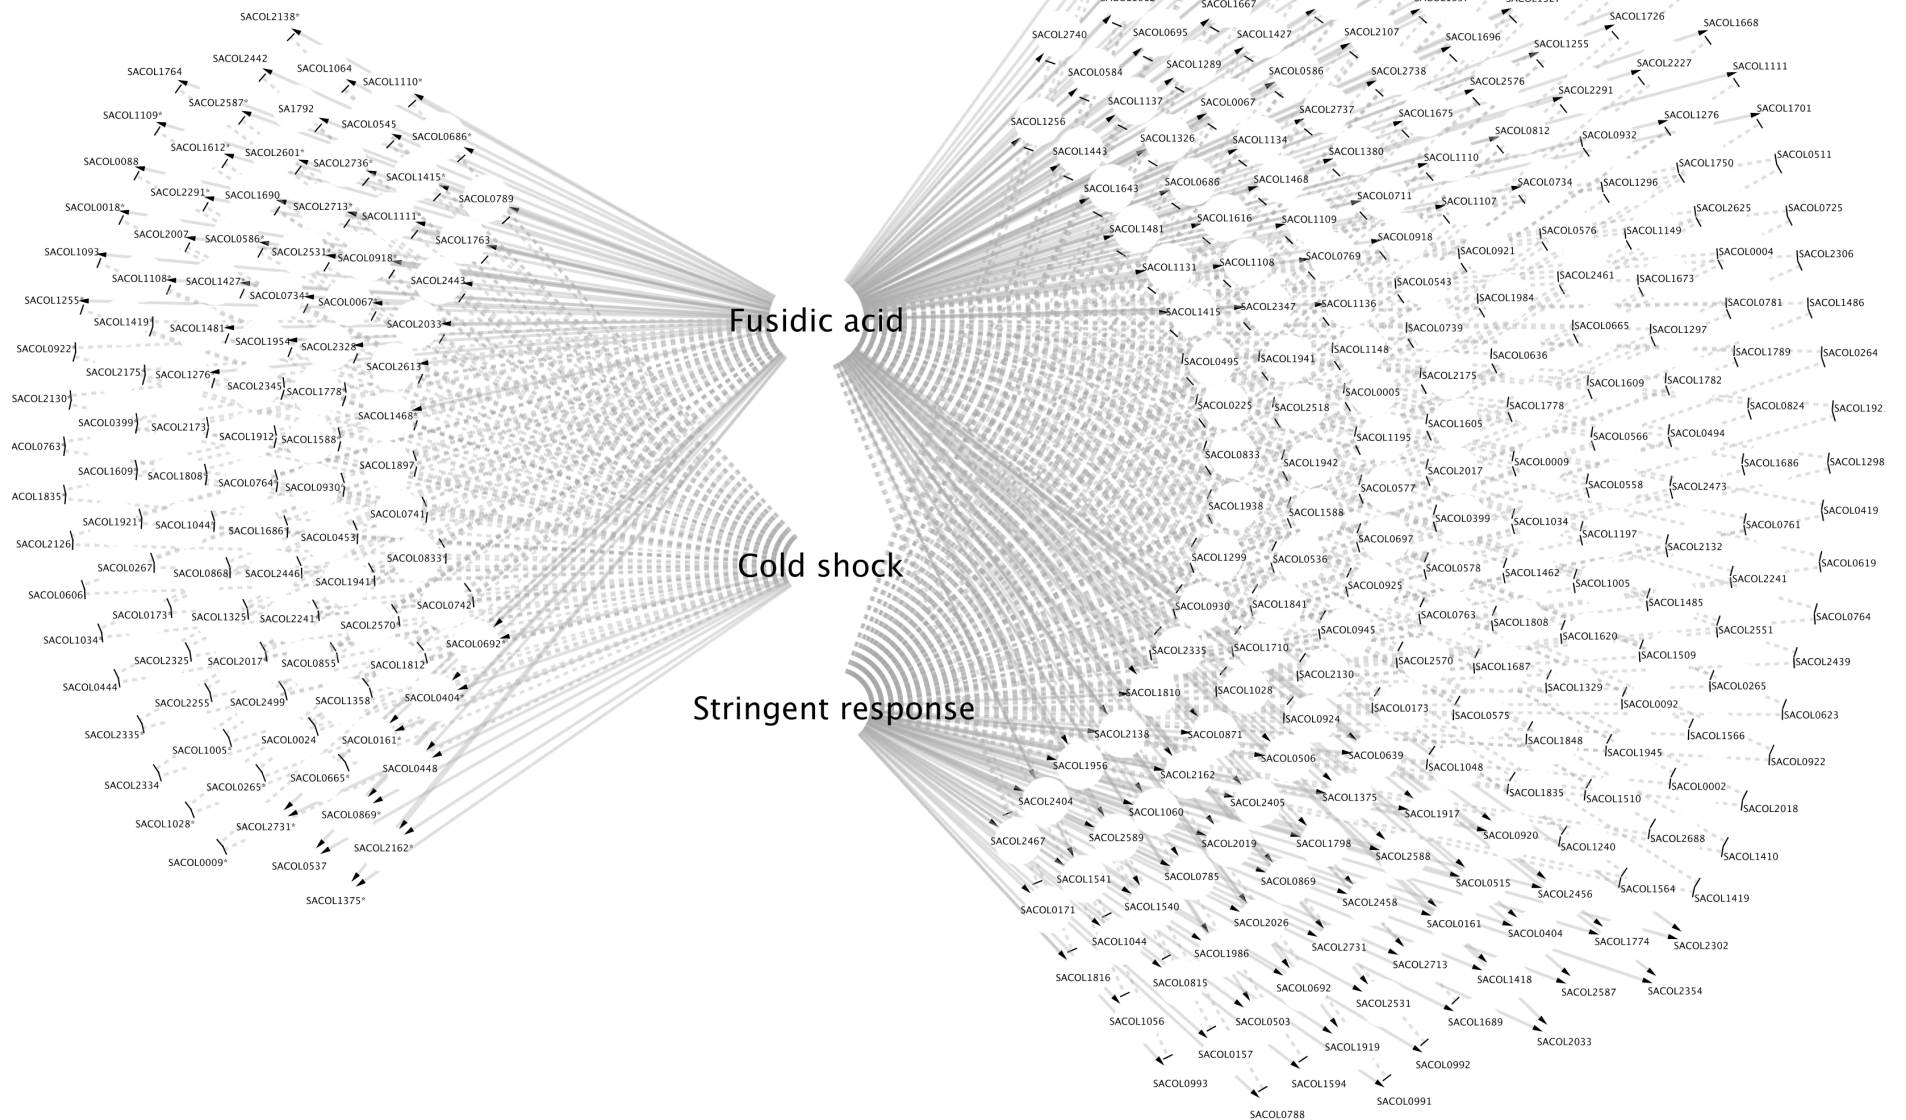

Supplement: dkn363_1.pdf [file dkn363_1.pdf]
